# Supplementary material for: Nitrogen-inserted nickel nanosheets with controlled orbital hybridization and strain fields for boosted hydrogen oxidation in alkaline electrolytes
Source: Royal Society of Chemistry journal article supplement (doi:10.1039/d1ee03482k), 2022-01-01
Supplement: d1ee03482k1.pdf [file d1ee03482k1.pdf]

Supplementary Information

**Nitrogen-inserted nickel nanosheets with controlled orbital hybridization and strain fields for boosted hydrogen oxidation in alkaline electrolytes**

Xu Zhao,<sup>†,a</sup> Xiangyang Li,<sup>†,b</sup> Lulu An,<sup>a</sup> Kevin Iputera,<sup>c</sup> Jiang Zhu,<sup>a</sup> Pengfei Gao,<sup>b</sup> Ru-Shi Liu,<sup>\*c</sup> Zhenmeng Peng,<sup>\*d</sup> Jinlong Yang<sup>\*b</sup> and Deli Wang<sup>\*a</sup>

<sup>a</sup>Key laboratory of Material Chemistry for Energy Conversion and Storage (Ministry of Education), Hubei Key Laboratory of Material Chemistry and Service Failure, School of Chemistry and Chemical Engineering, Huazhong University of Science and Technology, Wuhan, Hubei, 430074, P. R. China.

<sup>b</sup>Hefei National Laboratory for Physical Sciences at the Microscale, Synergetic Innovation Center of Quantum Information and Quantum Physics, University of Science and Technology of China, Hefei, Anhui, 230026, P. R. China.

<sup>c</sup>Department of Chemistry, National Taiwan University, Taipei 106, Taiwan.

<sup>d</sup>Department of Chemical and Biomolecular Engineering, University of Akron, Akron, Ohio 44325, United States.

<sup>†</sup>These authors contributed equally to this work.

*\*Corresponding authors:* rslu@ntu.edu.tw (R. S. Liu), zpeng@uakron.edu (Z. M. Peng) jlyang@ustc.edu.cn (J. L. Yang), wangdl81125@hust.edu.cn (D. L. Wang)

## **Experimental sections**

### **Chemicals and materials.**

Nickel (III) nitrate hexahydrate ( $\text{Ni}(\text{NO})_3 \cdot 6\text{H}_2\text{O}$ ), 1-Methyl-2-pyrrolidone ( $\text{C}_5\text{H}_9\text{NO}$ ), ethanol ( $\text{C}_2\text{H}_6\text{O}$ ), isopropyl alcohol ( $\text{C}_3\text{H}_8\text{O}$ ), and potassium hydroxide (KOH) were purchased from Sinopharm Chemical Reagent Co. Ltd (Shanghai, China). Ultrapure water with a resistivity of 18.2 M $\Omega$  cm was used in all experiments.

### **Materials synthesis.**

In a typical synthesis, the N-Ni nanosheets were prepared by a two-step method. First, sheet-like  $\text{Ni}(\text{OH})_2$  precursors were synthesized by using a solvothermal route with modification.<sup>1</sup> Briefly,  $\text{Ni}(\text{NO})_3 \cdot 6\text{H}_2\text{O}$  (3 mmol) was dissolved in a mixture of  $\text{C}_5\text{H}_9\text{NO}$  (27 mL) and DI water (3 mL) via magnetic stirring for 30 min, which was then transferred into a Teflon-lined autoclave and kept reacting at 180 °C for 6 h. After cooling to room temperature,  $\text{Ni}(\text{OH})_2$  precursors were collected and dried under vacuum. For the synthesis of N-Ni nanosheets, 30 mg of the  $\text{Ni}(\text{OH})_2$  precursors were placed in the quartz tube and heated at 350 °C for 4h under  $\text{NH}_3$  atmosphere with a flow rate of 100 sccm. After that, the final 4.3%N-Ni nanosheets were obtained. Furthermore, 3.5%N-Ni nanosheets and 1.6% N-Ni nanosheets could also be prepared via similar reduction procedures, except using the reducing atmosphere of  $\text{NH}_3/\text{Ar}$  (80/20 sccm) and  $\text{NH}_3/\text{Ar}$  (60/40 sccm), respectively. In addition, pure Ni nanosheets could be obtained by heating the precursors at 400 °C for 4h in the reducing atmosphere of  $\text{H}_2/\text{Ar}$  (10/90 sccm).

### **X-ray absorption spectroscopy measurements.**

XAS spectra were collected from the 17C1 beamline of the National Synchrotron Radiation Research Center (NSRRC) in Hsinchu, Taiwan. The storage work at 1.50 GeV with a beam current of 360 mA. The fluorescence mode was used to characterize all XAS results. The X-ray pre-edge and post-edge absorption were normalized to 0 and 1, respectively.

### **DFT calculations.**

Density functional theory calculations were performed to investigate the hydrogen oxidation reaction on the N-Ni and pure Ni structures within the Perdew-Burke-Ernzerhof (PBE) generalized gradient approximation (GGA), which is implemented in Vienna ab initio Simulation Package (VASP).<sup>2</sup> The projected augmented wave (PAW) method was used by the plane-wave basis with a kinetic cutoff energy of 500 eV.<sup>3</sup> To avoid periodic image interactions, a vacuum layer of about 15 Å was adopted along the z-axis for all the slab models. The Ni(111) surface with four Ni layers containing 64 atoms was simulated. The Brillouin zone was sampled by a 2×3×1 k-points grid. All atoms except those in the bottom two Ni layers were fully relaxed until the residual force was less than 0.01 eV/Å. The convergence criterion for the total energy was set to 1×10<sup>-6</sup> eV. DFT-D2 method proposed by Grimme was adopted for van der Waals interactions.<sup>4</sup> Similar method was also performed for the N-Ni(111) surface, in which the N atoms tended to be in the body-center site of the bulk Ni structure. To simulate the N-Ni(111) surface with Ni-Ni coordination missing, we randomly dug out an exposed Ni atom on the surface layer.

The HBE values were calculated by using the following equation:

$$\text{HBE} = E_{\text{H@cat.}} - E_{\text{cat.}} - E_{\text{H}} \quad (1)$$

The OHBE values were calculated by using the following equation:

$$\text{OHBE} = E_{\text{OH@cat.}} - E_{\text{cat.}} - E_{\text{OH}} \quad (2)$$

where  $E_{\text{H@cat.}}$  and  $E_{\text{OH@cat.}}$  are the total energies of catalyst surface with adsorbed H and OH species, respectively;  $E_{\text{cat.}}$  represents the energies of catalyst surface;  $E_{\text{H}}$  is one-half the energy of gas-phase H<sub>2</sub>;  $E_{\text{OH}}$  represents the energy of gas-phase H<sub>2</sub>O minus one-half the energy of gas-phase H<sub>2</sub>.

The hydrogen adsorption free energy was determined as  $\Delta G = \text{HBE} + \Delta E_{\text{ZPE}} - T\Delta S$ , where  $\Delta E_{\text{ZPE}}$  and  $\Delta S$  are zero-point energy correction and entropy change of hydrogen adsorption, respectively. At  $T=298.15$  K,  $\Delta G$  can be calculated by  $\Delta G = \text{HBE} + 0.24$  eV.<sup>5</sup>

### **Electrochemical measurements.**

All the HOR electrochemical measurements were performed at a CHI660E electrochemical workstation at room temperature. A graphite rod and a reversible hydrogen electrode were employed as the counter and reference electrode, respectively. To prepare the working

electrode, 5 mg of N-Ni catalysts with Vulcan XC-72 carbon supports were dispersed in a mixture containing 1 mL of isopropyl alcohol and 15  $\mu\text{L}$  of 5 wt% Nafion solution under ultrasonication for 1 h. A certain amount of the suspension was deposited on the RDE with the loading amount to be  $0.32 \text{ mg cm}^{-2}$ . Before HOR measurements, the 0.1 M KOH electrolytes were purged with high-purity  $\text{H}_2$  for half an hour. The polarization curves were measured at a rotating speed of 1600 rpm with a scan rate of  $1 \text{ mV s}^{-1}$ . All the polarization curves were  $iR$ -corrected. The accelerated durability tests were performed by potential cycling in the range of -0.05-0.15 V for 2000 cycles with a scan rate of  $100 \text{ mV s}^{-1}$  in  $\text{H}_2$ -saturated 0.1 M KOH electrolyte. After that, a polarization curve at a scan rate of  $1 \text{ mV s}^{-1}$  was recorded. The chronoamperometry tests were carried out at a constant potential of 50 mV in  $\text{H}_2$ -saturated 0.1 M KOH electrolyte. Electrochemical active surface areas (ECSAs) were obtained by conducting cyclic voltammetry at the potential region from -0.15-0.6 V in  $\text{N}_2$ -saturated 0.1 M KOH electrolyte with a scan rate of  $50 \text{ mV s}^{-1}$ . The value of ECSA was calculated from the integrated region of OH desorption at the backward scan. The mass activities were obtained by normalizing the kinetic current to the loading mass of catalysts. The specific activities were elevated through normalizing the exchange current to the real active surface area of catalysts.

The kinetic current density ( $j_k$ ) was calculated by the Koutecky-Levich equation:

$$\frac{1}{j} = \frac{1}{j_k} + \frac{1}{j_d} = \frac{1}{j_k} + \frac{1}{Bc_0\omega^{1/2}} \quad (3)$$

where  $j$ ,  $j_d$ ,  $B$ ,  $c_0$  and  $\omega$  are the measured current density, diffusion-limited current, the Levich constant, the solubility of  $\text{H}_2$  in alkaline solution and the rotation speed of the electrode, respectively.

The exchange current density ( $j_0$ ) could be calculated from the Butler-Volmer equation:

$$j_k = j_0 \left( e^{\frac{\alpha F}{RT}\eta} - e^{-\frac{(1-\alpha)F}{RT}\eta} \right) \quad (4)$$

where  $\alpha$ ,  $\eta$  and  $T$  refer to the charge transfer coefficient, overpotential and the operating temperature, respectively.  $F$  and  $R$  correspond to the Faraday constant and the universal gas constant, respectively.

**Characterization techniques.**

TEM images were collected using a Hitachi H-7650 transmission electron microscope with 100 kV acceleration voltage. HRTEM, HAADF-STEM images and EDX mappings were obtained using a probe spherical aberration corrected JEM-ARM200F microscope with 200 kV accelerating voltage. SEM images were collected on a Nova NanoSEM 450 scanning electron microscope. XRD patterns were collected on the X-ray diffractometer (SmartLab SE, Rigaku) with Cu-K $\alpha$  radiation ( $\lambda=0.1541$  nm). ICP-OES (Avio 200, PerkinElmer) was used to determine the content of Ni. The GSB 04-1740-2004 Ni standard solution (1000 mg/L, Guobiao (Beijing) Testing & Certification Co., Ltd.) was used for ICP-OES. XPS spectra were obtained using an X-ray photoelectron spectrometer (K-alpha, Thermo Scientific) with a monochromatic Al K $\alpha$  X-ray source ( $h\nu=1486.6$  eV). AFM images were collected on a scanning probe microscope (SPM-9700, Shimadzu). Zeta potentials were recorded on a Malvern Zetasizer Nano ZS 90 equipment.

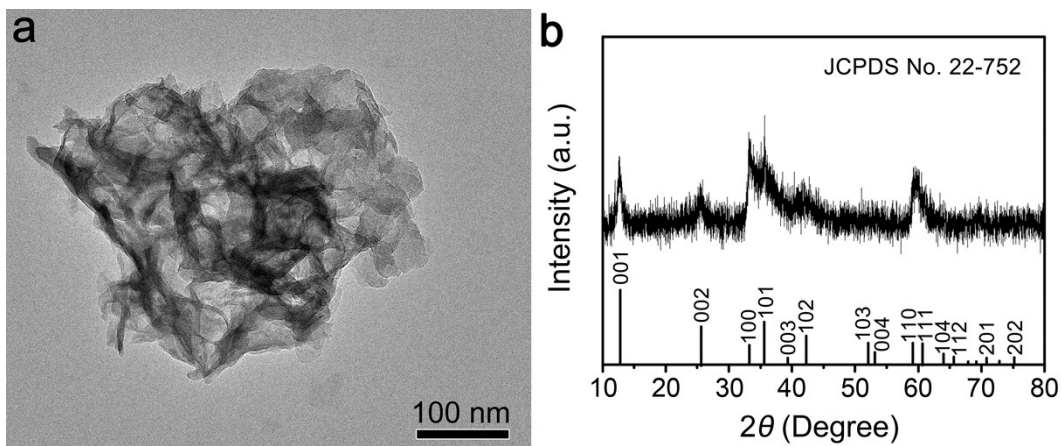

**Fig. S1** (a) TEM image of Ni(OH)<sub>2</sub> nanosheets. (b) XRD pattern of Ni(OH)<sub>2</sub> nanosheets. The standard XRD profile for Ni(OH)<sub>2</sub> phase (JCPDS No. 22-752) is shown at the bottom.

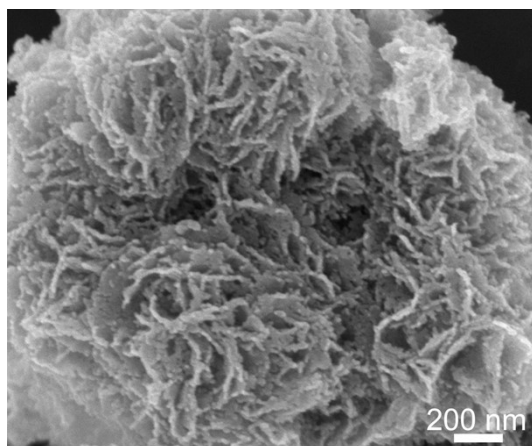

**Fig. S2** SEM image of 4.3%N-Ni nanosheets.

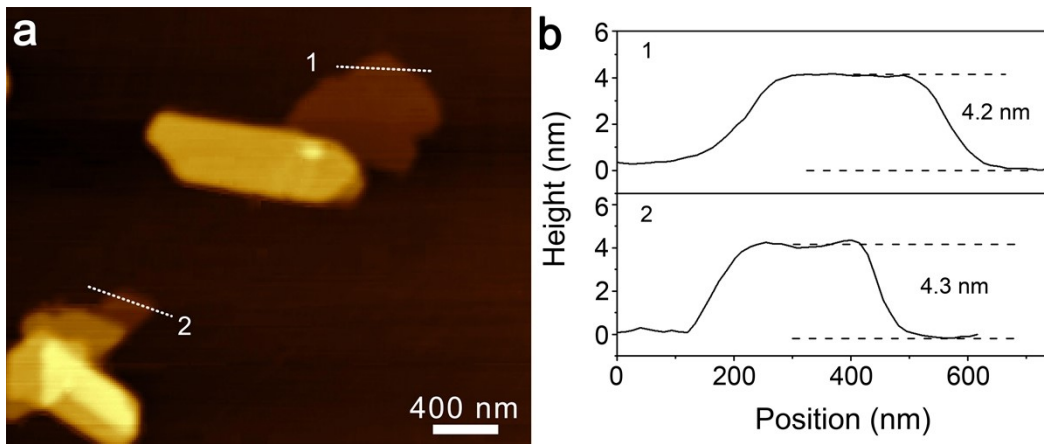

**Fig. S3** (a) AFM image of 4.3%N-Ni nanosheets. (b) Height profiles along the direction marked in (a).



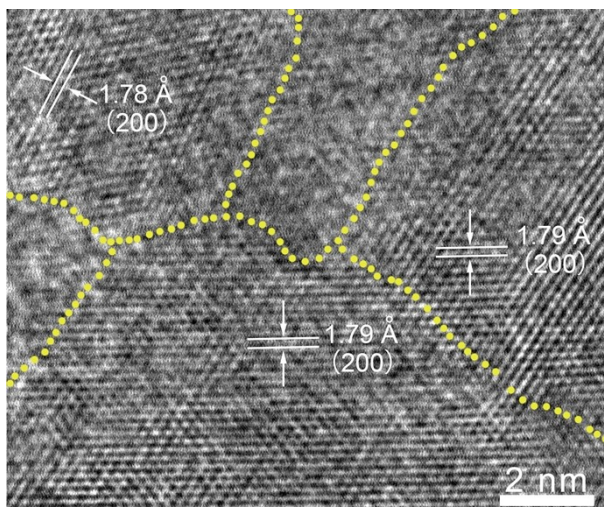

**Fig. S4** HRTEM image of 4.3%N-Ni nanosheets.

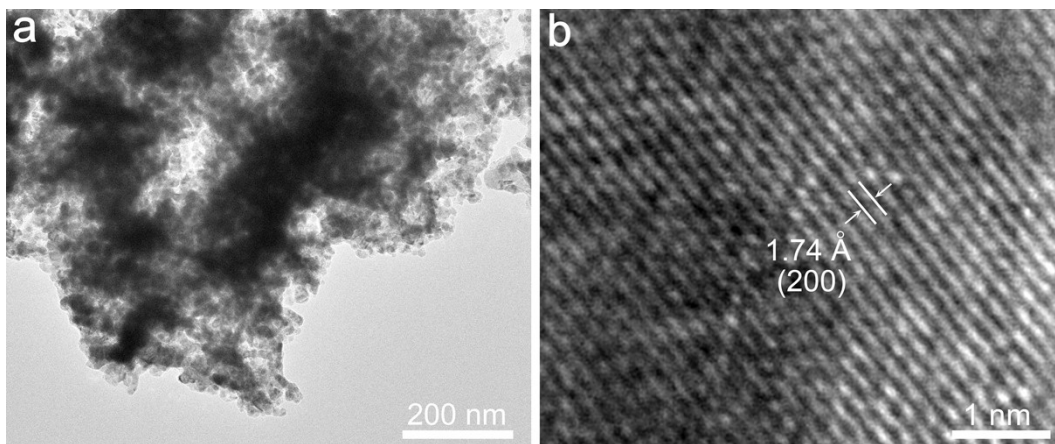

**Fig. S5** (a) TEM image and (b) HRTEM image of pure Ni nanosheets.

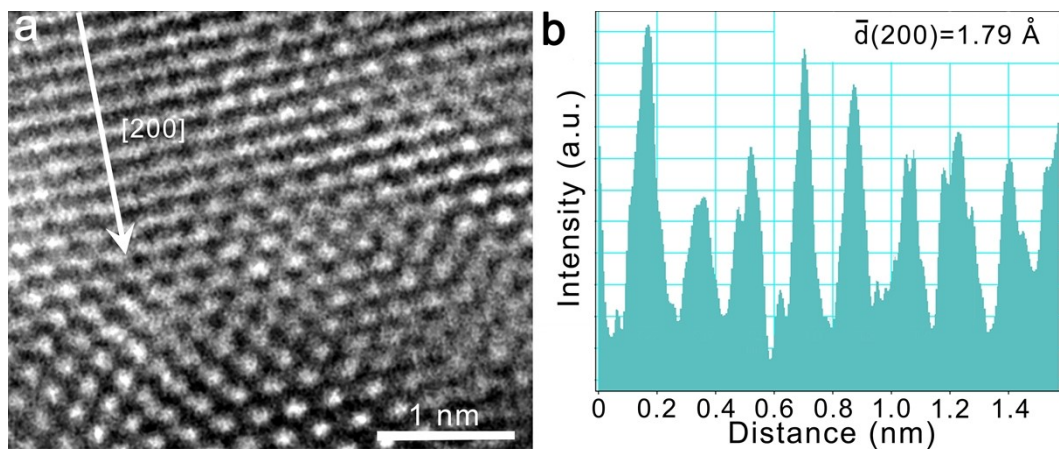

**Fig. S6** (a) AC HAADF-STEM image of 4.3%N-Ni nanosheets. (b) Intensity profile recorded along the white line marked in (a).

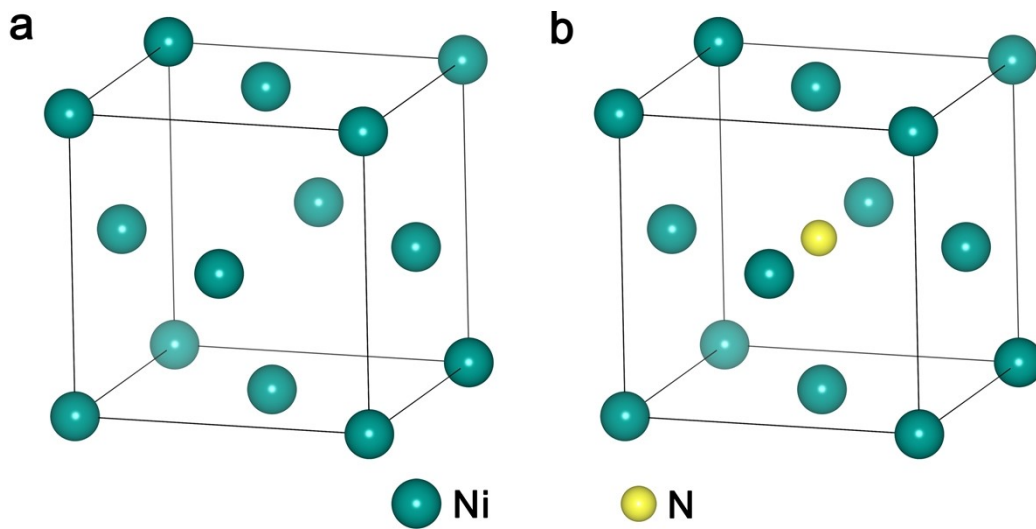

**Fig. S7** Illustration of (a) Ni unit cell and (b) N-inserted Ni unit cell.

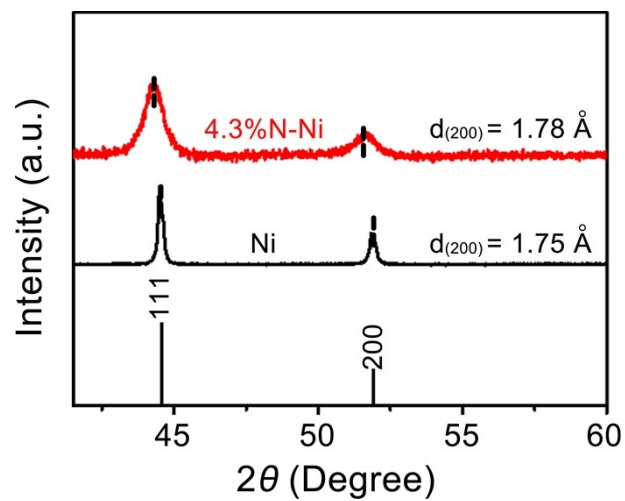

**Fig. S8** Enlarged XRD patterns of pure Ni and 4.3%N-Ni nanosheets.

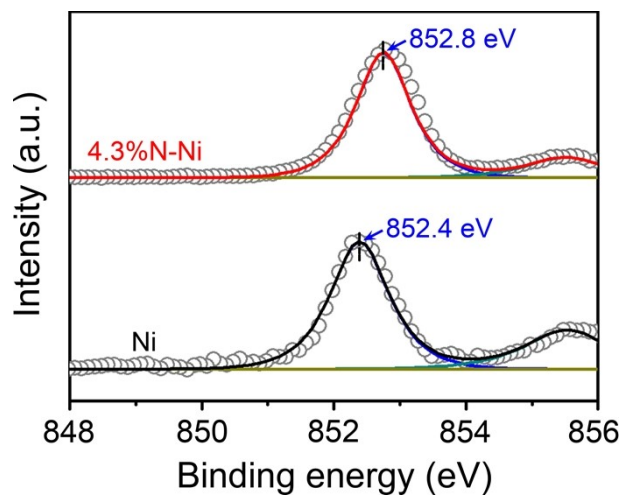

**Fig. S9** Enlarged XPS spectra of pure Ni and 4.3%N-Ni nanosheets.

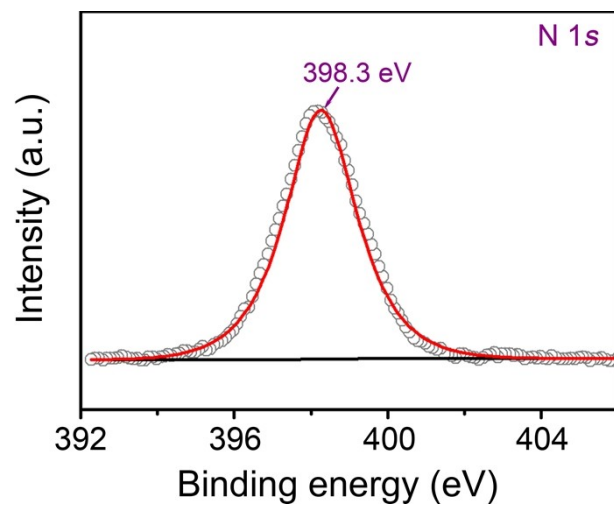

**Fig. S10** N 1s XPS spectrum of 4.3%N-Ni nanosheets.

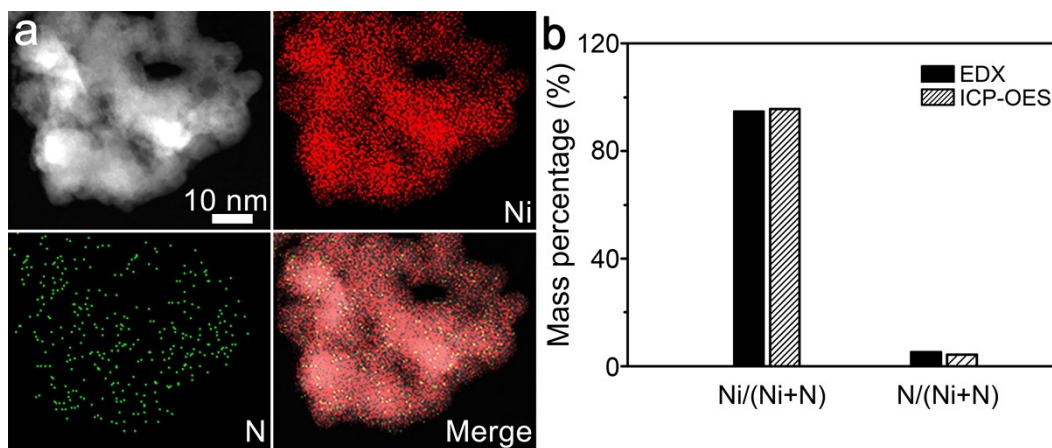

**Fig. S11** (a) High-magnification STEM image and elemental mapping of Ni, N and merged image for an individual 4.3%N-Ni nanosheet. (b) Comparison of the content of Ni and N obtained by EDX and ICP-OES measurements.



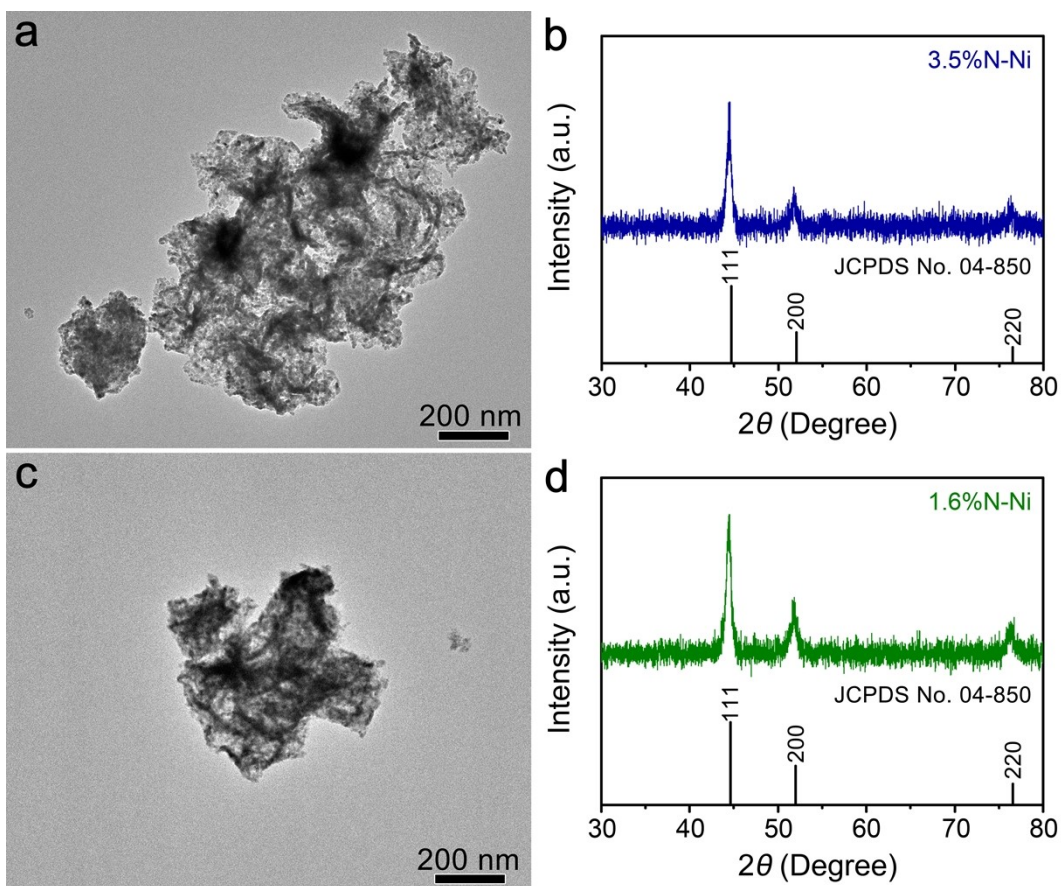

**Fig. S12** (a, b) TEM image and XRD pattern of 3.5%N-Ni nanosheets. (c, d) TEM image and XRD pattern of 1.6%N-Ni nanosheets. The standard XRD patterns for fcc Ni (JCPDS No. 04-850) are attached at the bottom.

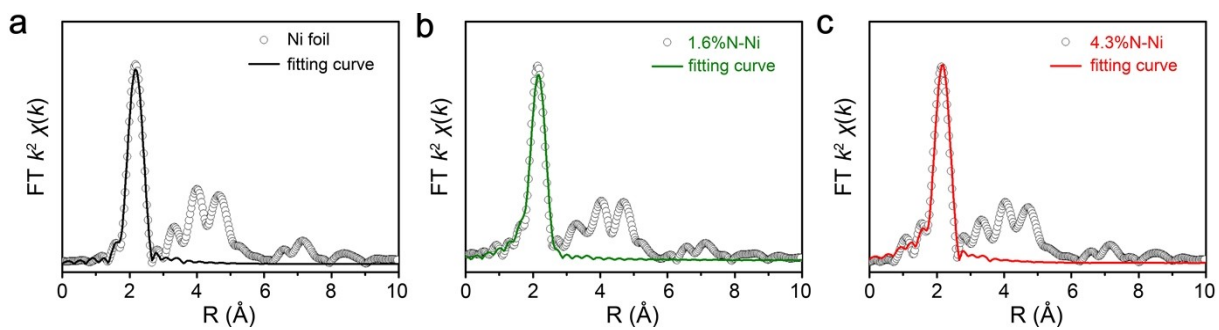

**Fig. S13** EXAFS fitting curves for (a) Ni foil, (b) 1.6%N-Ni nanosheets, and (c) 4.3%N-Ni nanosheets.

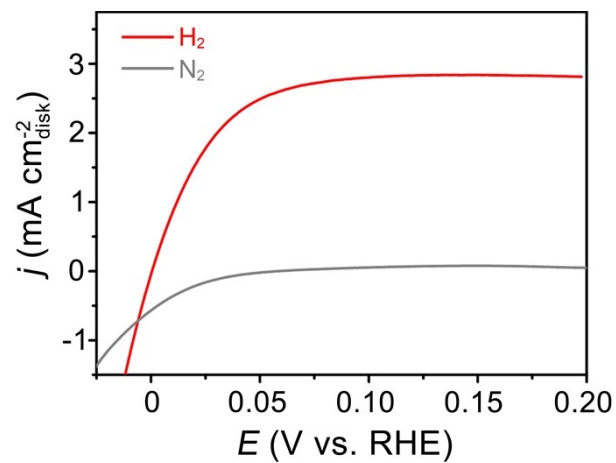

**Fig. S14** Comparison of polarization curves of 4.3%N-Ni nanosheets recorded in  $\text{H}_2$ -saturated 0.1 M KOH and Ar-saturated 0.1 M KOH.

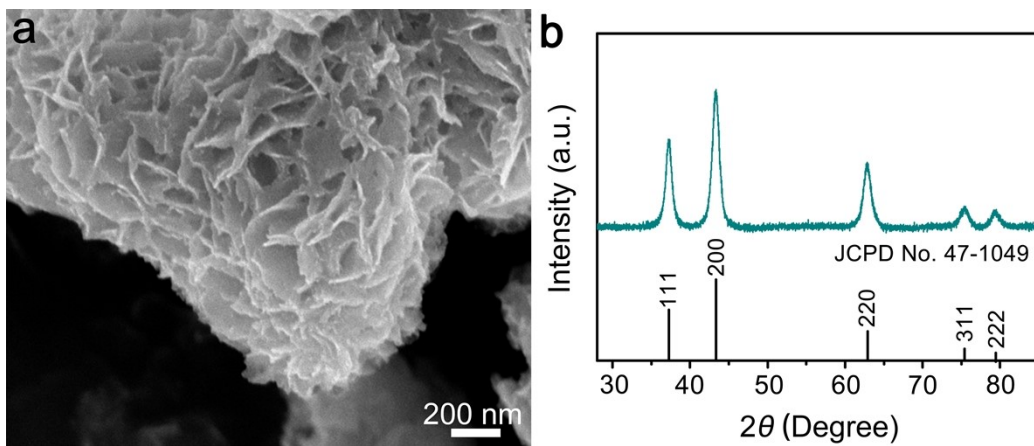

**Fig. S15** (a) SEM image and (b) XRD pattern of NiO nanosheets. The NiO nanosheets were synthesized via the similar procedure with N-Ni nanosheets except using the air atmosphere.

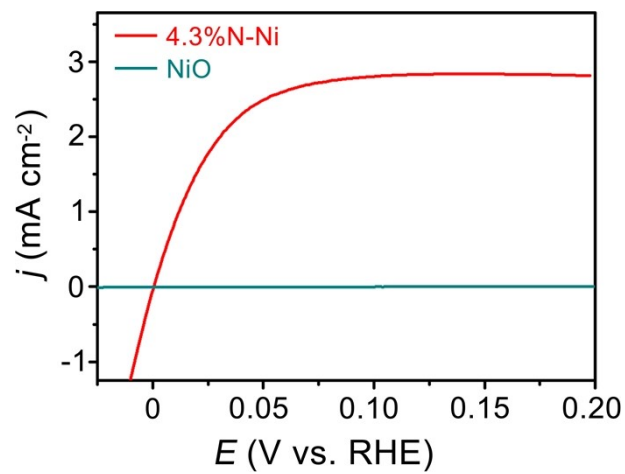

**Fig. S16** HOR polarization curve of 4.3%N-Ni and NiO nanosheets.

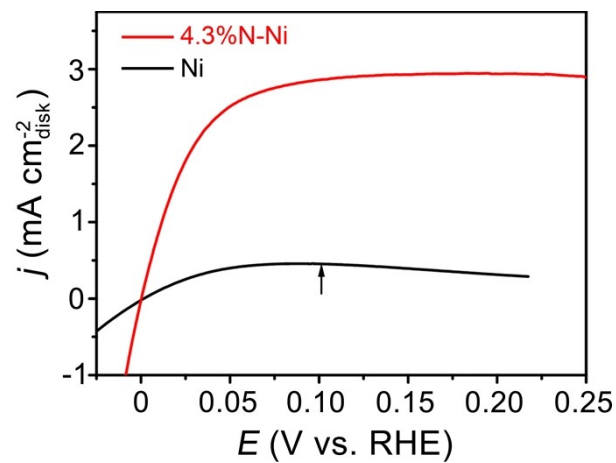

**Fig. S17** Comparison of HOR polarization curves of 4.3%N-Ni and pure Ni nanosheets in the enlarged potential range.

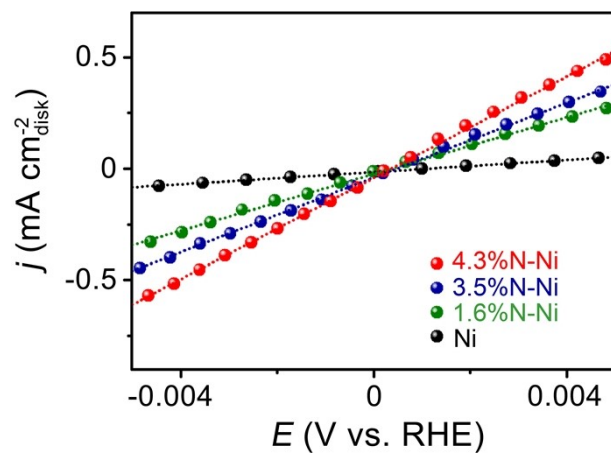

**Fig. S18** Micro-polarization regions of 4.3%N-Ni, 3.5%N-Ni, 1.6%N-Ni, and pure Ni nanosheets.

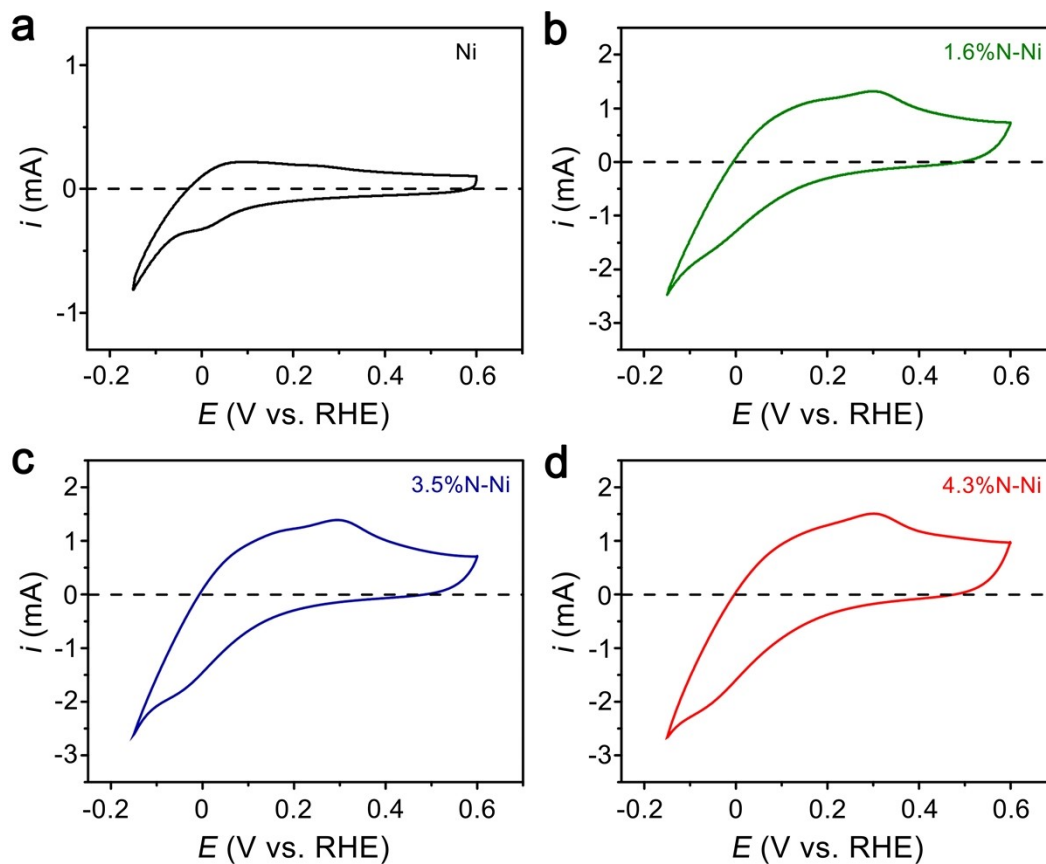

**Fig. S19** Cyclic voltammetry of (a) Ni, (b) 1.6%N-Ni, (c) 3.5%N-Ni, and (d) 4.3%N-Ni nanosheets recorded in  $N_2$ -saturated 0.1 M KOH electrolyte with a sweep rate of  $50 \text{ mV s}^{-1}$ . ECSA could be evaluated from the OH desorption regions.



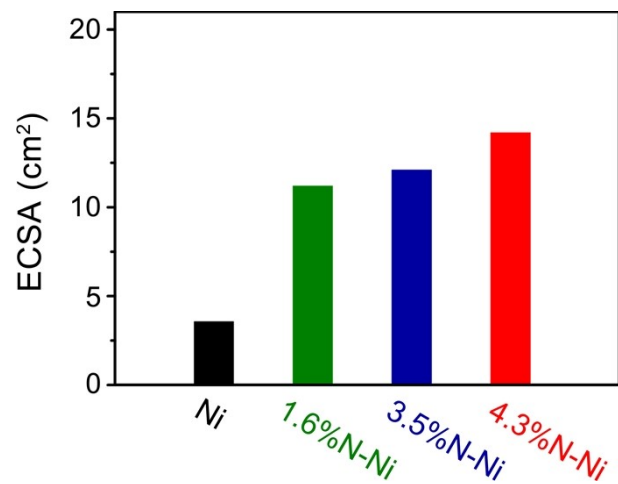

**Fig. S20** Comparison of ECSAs for Ni and N-Ni nanosheets.

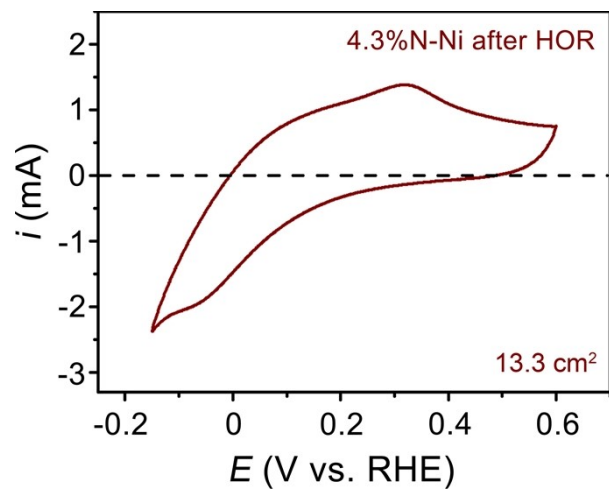

**Fig. S21** Cyclic voltammetry of 4.3%N-Ni nanosheets after the long-term durability test. Inset shows the calculated ECSA value.

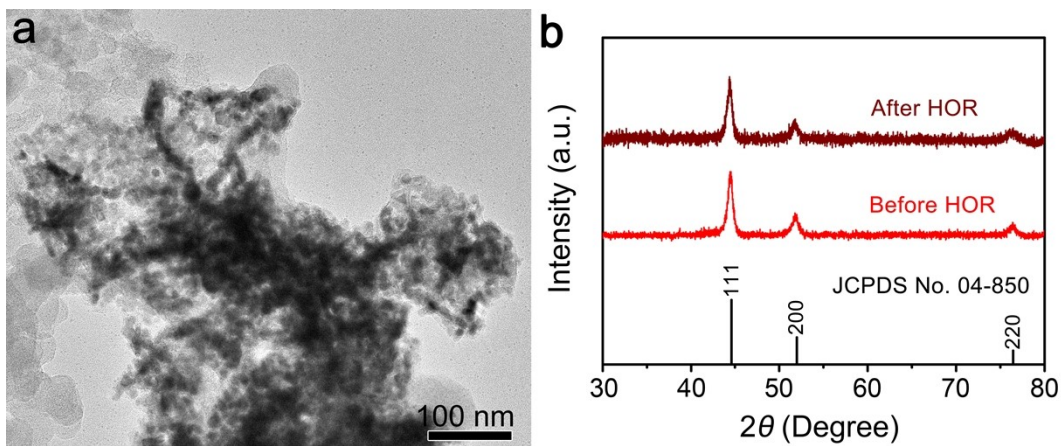

**Fig. S22** (a) TEM image of 4.3%N-Ni nanosheets after the long-term durability test. (b) Comparison of XRD patterns of 4.3%N-Ni nanosheets before and after the durability test. The standard XRD profile for fcc Ni (JCPDS No. 04-850) is listed at the bottom.

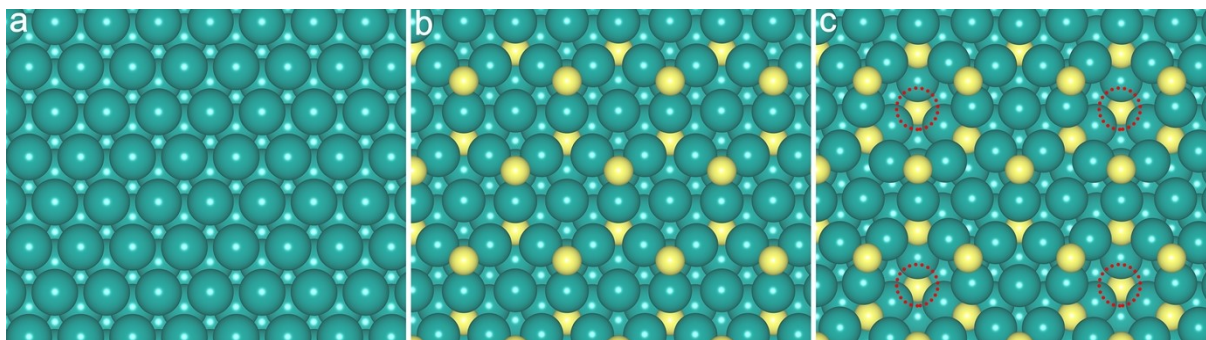

**Fig. S23** Models of (a) pure Ni with (111) surface, (b) N-Ni<sub>(f)</sub> with flat (111) surface, and (c) N-Ni<sub>(d)</sub> with (111) surface containing Ni deficiencies. Cyan and yellow spheres represent Ni and N atoms, respectively. Red circles represent Ni deficiencies.

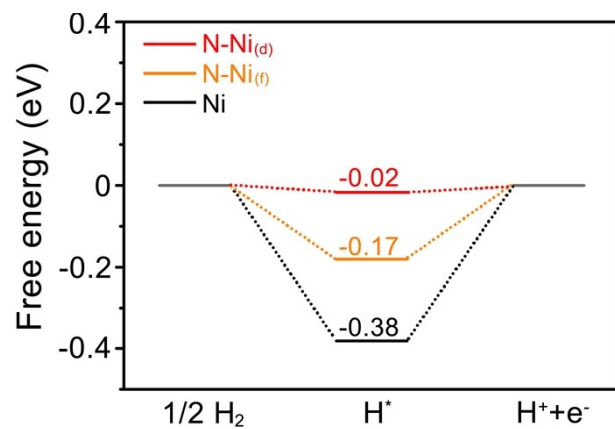

**Fig. S24** Gibbs free energy for hydrogen adsorption on Ni, N-Ni<sub>(f)</sub> and N-Ni<sub>(d)</sub> structures.

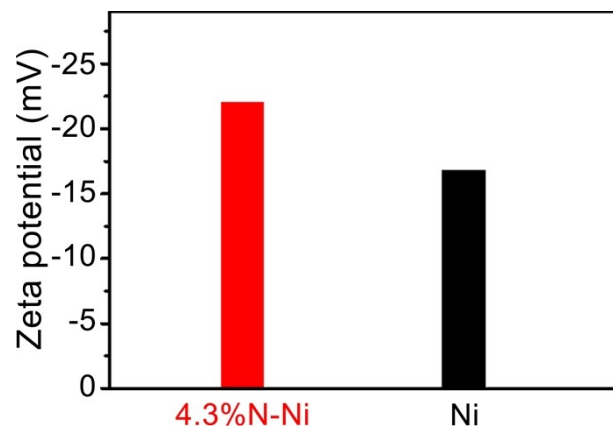

**Fig. S25** Comparison of zeta potentials for 4.3%N-Ni and Ni.

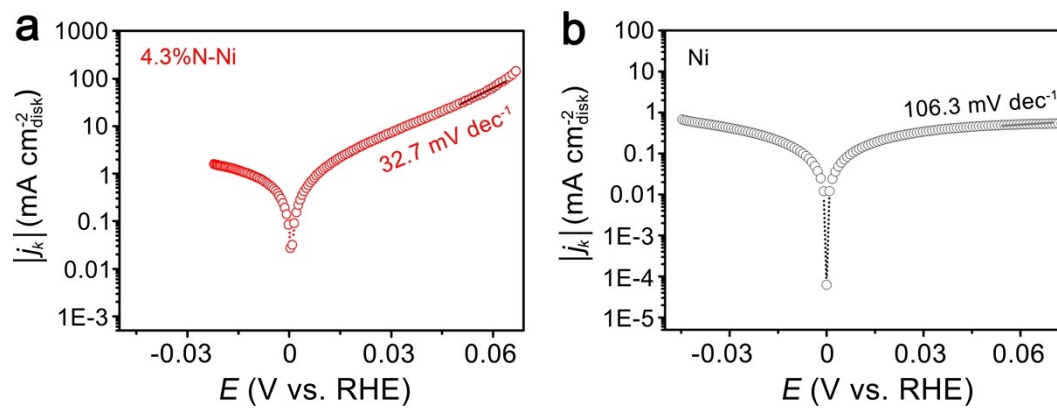

**Fig. S26** Tafel plots of the kinetic current density on (a) 4.3%N-Ni and (b) pure Ni nanosheets in  $\text{H}_2$ -saturated  $0.1 \text{ M KOH}$ .

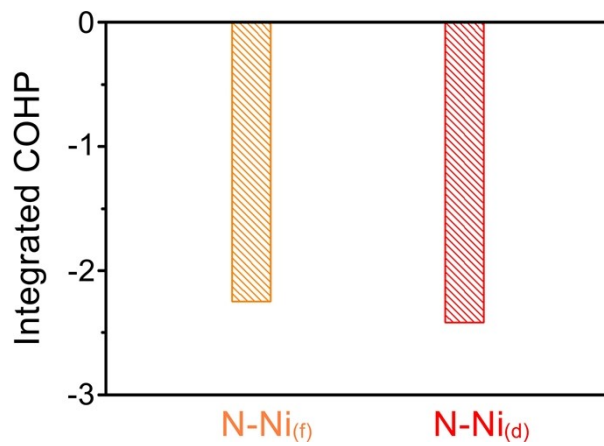

**Fig. S27** Integrated COHP values from bonding/antibonding orbitals of N-Ni<sub>(f)</sub> and N-Ni<sub>(d)</sub> structures.



**Table S1** XPS binding energies (eV) of the Ni 2*p* peaks for pure Ni and 4.3%N-Ni nanosheets.

| Materials | Ni 2 <i>p</i> <sub>3/2</sub> |               | Ni 2 <i>p</i> <sub>1/2</sub> |               |
|-----------|------------------------------|---------------|------------------------------|---------------|
|           | Main peak                    | Impurity peak | Main peak                    | Impurity peak |
| Ni        | 852.4                        | 855.5         | 869.8                        | 873.3         |
| 4.3%N-Ni  | 852.8                        | 855.5         | 870.2                        | 873.3         |

**Table S2** EXAFS fitting parameters at the Ni K-edge for tested samples.

| Sample   | Path  | $CN^{(a)}$ | $R(\text{\AA})^{(b)}$ | $\sigma^2 (\text{\AA}^2)$ |
|----------|-------|------------|-----------------------|---------------------------|
| Ni foil  | Ni-Ni | 10.44      | 2.480                 | 0.00751                   |
| 1.6%N-Ni | Ni-Ni | 4.14       | 2.485                 | 0.00899                   |
|          | Ni-N  | 1.22       | 1.912                 | 0.01630                   |
| 4.3%N-Ni | Ni-Ni | 3.108      | 2.490                 | 0.00678                   |
|          | Ni-N  | 1.702      | 1.911                 | 0.02690                   |

<sup>(a)</sup> $CN$ , coordination number; <sup>(b)</sup> $R$ , bond distance.

**Table S3** HOR activity of reported non-noble metal-based catalysts in alkaline electrolyte.

| Materials                            | Electrolyte | Rotating Speed (rpm) | Loading (mg cm <sup>-2</sup> ) | $j_{k,m}$ @50 mV (mA mg <sub>cat</sub> <sup>-1</sup> ) | $j_{0,s}$ (μA cm <sup>-2</sup> ) | Reference |
|--------------------------------------|-------------|----------------------|--------------------------------|--------------------------------------------------------|----------------------------------|-----------|
| 4.3%N-Ni nanosheet                   | 0.1M KOH    | 1600                 | 0.32                           | 77.13                                                  | 41                               | This work |
| Ni/N-CNTs                            | 0.1M KOH    | 2500                 | 0.25                           | 9.3                                                    | 28                               | S6        |
| Ni-H <sub>2</sub>                    | 0.1M KOH    | 2500                 | 0.14                           | 50.4                                                   | 28                               | S7        |
| Ni/NiO                               | 0.1M KOH    | 1600                 | 0.5                            | 5.0                                                    | 26                               | S8        |
| NiMo                                 | 0.1M NaOH   | 1600                 | 0.1                            | /                                                      | 27                               | S9        |
| NiB/Ni                               | 0.1M KOH    | 2500                 | 0.142                          | 24.7                                                   | 26                               | S10       |
| CoNiMo                               | 0.1M KOH    | 1600                 | /                              | /                                                      | 15                               | S11       |
| Ni <sub>3</sub> N                    | 0.1M KOH    | 2500                 | 0.31                           | 24.38                                                  | 14                               | S12       |
| np-Ni <sub>3</sub> N                 | 0.1M KOH    | 1600                 | 0.16                           | 29.8                                                   | /                                | S13       |
| Ni <sub>3</sub> N/Ni/NF              | 0.1M KOH    | /                    | /                              | /                                                      | 3                                | S14       |
| Ni/SC                                | 0.1M KOH    | 2500                 | 0.30                           | 11.0                                                   | 40.2                             | S15       |
| NiCu                                 | 0.1M KOH    | 1600                 | /                              | /                                                      | 25                               | S16       |
| CeO <sub>2</sub> /Ni                 | 0.1M KOH    | 2500                 | 0.306                          | 12.28                                                  | 38                               | S17       |
| Ni <sub>5.2</sub> WCu <sub>2.2</sub> | 0.1M KOH    | /                    | /                              | 2.55                                                   | 14                               | S18       |

**Table S4** Summary of the exchange current density calculated from micro-polarization regions and Tafel regions.

| <b>Materials</b>   | <b>Exchange current density (mA cm<sup>-2</sup>)</b> |                      |
|--------------------|------------------------------------------------------|----------------------|
|                    | <b>Micro-polarization regions</b>                    | <b>Tafel regions</b> |
| Pure Ni nanosheet  | 0.36                                                 | 0.36                 |
| 1.6%N-Ni nanosheet | 1.66                                                 | 1.66                 |
| 3.5%N-Ni nanosheet | 2.19                                                 | 2.15                 |
| 4.3%N-Ni nanosheet | 2.96                                                 | 2.94                 |

## References

- 1 H. C. Chen, Y. L. Qin, H. J. Cao, X. X. Song, C. H. Huang, H. B. Feng, X. S. Zhao, *Energy Storage Mater.* 2019, **17**, 194-203.
- 2 J. P. Perdew, K. Burke, M. Ernzerhof, *Phys. Rev. Lett.* 1996, **77**, 3865.
- 3 G. Kresse, D. Joubert, *Phys. Rev. B* 1999, **59**, 1758.
- 4 S. Grimme, *J. Comput. Chem.* 2006, **27**, 1787-1799.
- 5 M. Liu, Y. J. Peng, B. Zhang, P. D. Luna, O. Voznyy, J. X. Xu, X. L. Zheng, C. T. Dinh, F. J. Fan, C. H. Cao, F. P. G. de Arquer, T. S. Safaei, A. Mepham, A. Klinkova, E. Kumacheva, T. Filleter, D. Sinton, S. O. Kelley, E. H. Sargent, *Nature* 2016, **537**, 382-386.
- 6 Z. B. Zhuang, S. A. Giles, J. Zheng, G. R. Jenness, S. Caratzoulas, D. G. Vlachos, Y. S. Yan, *Nat. Commun.* 2016, **7**, 10141.
- 7 W. Y. Ni, T. Wang, P. A. Schouwink, Y. C. Chuang, H. M. Chen, X. L. Hu, *Angew. Chem. Int. Ed.* 2020, **59**, 10797-10801.
- 8 Y. Yang, X. D. Sun, G. Q. Han, X. Liu, X. Y. Zhang, Y. F. Sun, M. Zhang, Z. Cao, Y. J. Sun, *Angew. Chem. Int. Ed.* 2019, **58**, 10644-10649.
- 9 S. Kabir, K. Lemire, K. Artyushkova, A. Roy, M. Odgaard, D. Schlueter, A. Oshchepkov, A. Bonnefont, E. Savinova, D. C. Sabarirajan, P. Mandal, E. J. Crumlin, I. V. Zenyuk, P. Atanassov, A. Serov, *J. Mater. Chem. A* 2017, **5**, 24433-24443.
- 10 F. L. Yang, P. Y. Han, N. Yao, G. Z. Cheng, S. L. Chen, W. Luo, *Chem. Sci.* 2020, **11**, 12118-12123.
- 11 W. C. Sheng, A. P. Bivens, M. Myint, Z. B. Zhuang, R. V. Forest, Q. R. Fang, J. G. Chen, Y. S. Yan, *Energy Environ. Sci.* 2014, **7**, 1719-1724.
- 12 W. Y. Ni, A. Krammer, C. S. Hsu, H. M. Chen, A. Schuler, X. L. Hu, *Angew. Chem. Int. Ed.* 2019, **58**, 7445-7449.
- 13 T. T. Wang, M. Wang, H. Yang, M. Q. Xu, C. D. Zuo, K. Feng, M. Xie, J. Deng, J. Zhong, W. Zhou, T. Cheng, Y. G. Li, *Energy Environ. Sci.* 2019, **12**, 3522-3529.
- 14 F. Z. Song, W. Li, J. Q. Yang, G. Q. Han, P. L. Liao, Y. J. Sun, *Nat. Commun.* 2018, **9**, 4531.
- 15 F. L. Yang, X. Biao, Y. M. Zhao, X. W. Wang, G. Z. Cheng, W. Luo, *J. Mater. Chem. A* 2019, **7**,

10936-10941.

- 16 A. Roy, M. R. Talarposhti, S. J. Normile, I. V. Zenyuk, V. D. Andrade, K. Artyushkova, A. Serov, P. Atanassov, *Sustain. Energy Fuels* 2018, **2**, 2268-2275.
- 17 F. L. Yang, X. Bao, P. Li, X. W. Wang, G. Z. Cheng, S. L. Chen, W. Luo, *Angew. Chem. Int. Ed.* 2019, **58**, 14179-14183.
- 18 S. Qin, Y. Duan, X. L. Zhang, L. R. Zheng, F. Y. Gao, P. P. Yang, Z. Z. Niu, R. Liu, Y. Yang, X. S. Zheng, J. F. Zhu, M. R. Gao, *Nat. Commun.* 2021, **12**, 2686.
